# Supplementary material for: Objective evaluation of fatigue by EEG spectral analysis in steady-state visual evoked potential-based brain-computer interfaces
Source: Springer Nature journal article supplement (doi:10.1186/1475-925x-13-28), 2014-03-12

(a) Raw EEG

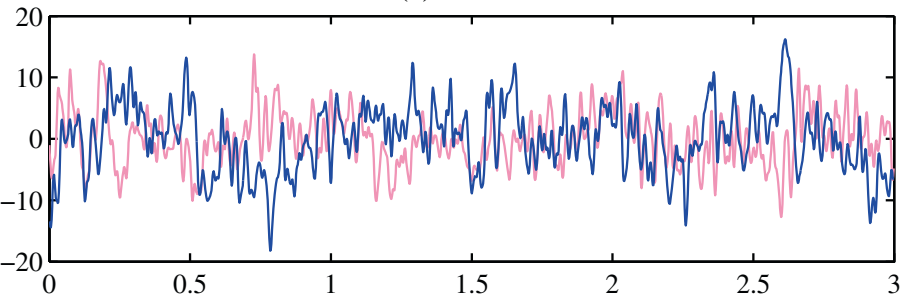

(b) Spectrum

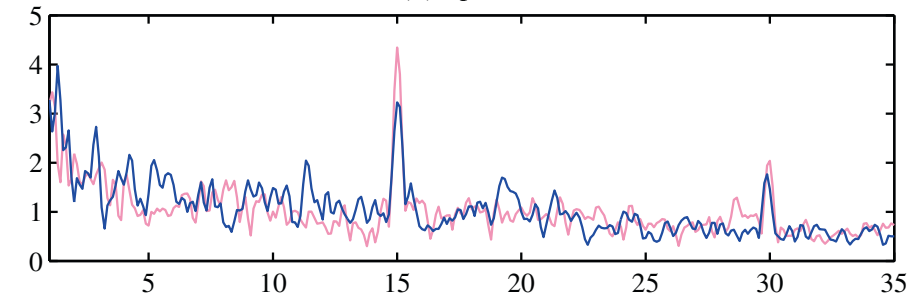

Supplement: 12938_2013_948_MOESM1_ESM.pdf [file 12938_2013_948_MOESM1_ESM.pdf]
