# Supplementary material for: Objective evaluation of fatigue by EEG spectral analysis in steady-state visual evoked potential-based brain-computer interfaces
Source: Springer Nature journal article supplement (doi:10.1186/1475-925x-13-28), 2014-03-12
Supplement: 12938_2013_948_MOESM2_ESM.pdf [file 12938_2013_948_MOESM2_ESM.pdf]

(a) Fatigue Score

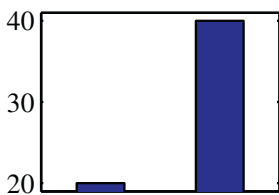(b)  $\delta$ 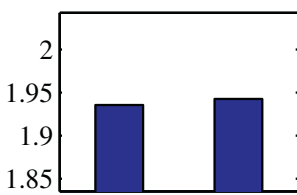(c)  $\theta$ 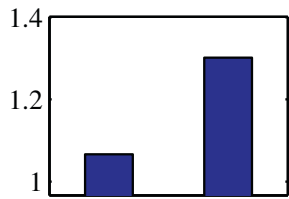(d)  $\alpha$ 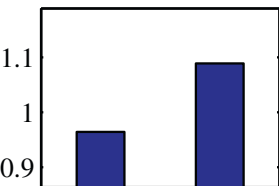(e)  $\beta$ 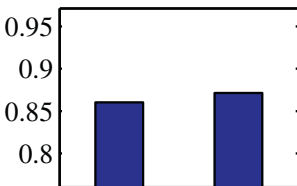(f)  $\theta/\alpha$ 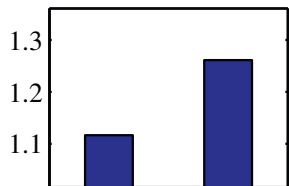(g)  $(\theta+\alpha)/\beta$ 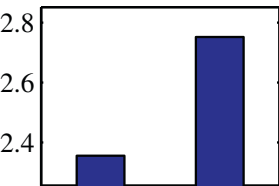

(h) SSVEP Amplitude

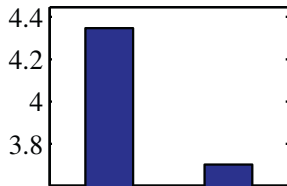

(i) SSVEP SNR

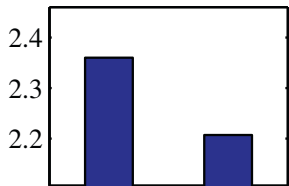

Alert

Fatigue

Alert

Fatigue

Alert

Fatigue
