# Supplementary material for: Objective evaluation of fatigue by EEG spectral analysis in steady-state visual evoked potential-based brain-computer interfaces
Source: Springer Nature journal article supplement (doi:10.1186/1475-925x-13-28), 2014-03-12
Supplement: 12938_2013_948_MOESM3_ESM.pdf [file 12938_2013_948_MOESM3_ESM.pdf]

**(a) Fatigue Score**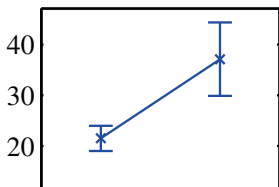**(b)  $\delta$** 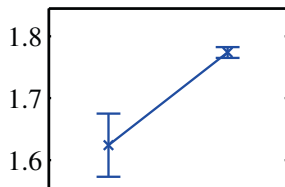**(c)  $\theta$** 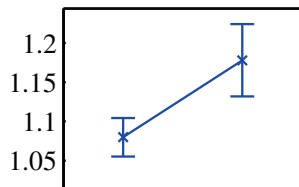**(d)  $\alpha$** 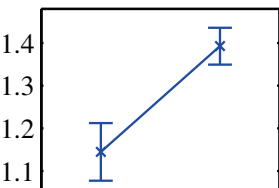**(e)  $\beta$** 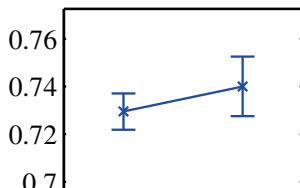**(f)  $\theta/\alpha$** 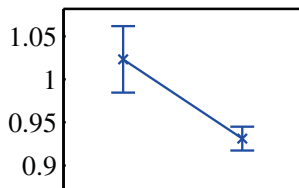**(g)  $(\theta+\alpha)/\beta$** 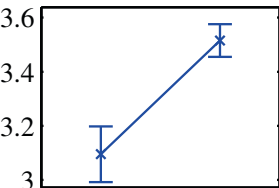**(h) SSVEP Amplitude**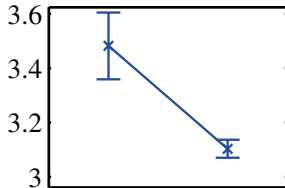**(i) SSVEP SNR**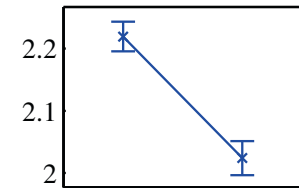

Alert Fatigue

Alert Fatigue

Alert Fatigue
